# Supplementary material for: Synthesis and Biological Evaluation of Amphotericin B Formulations Based on Organic Salts and Ionic Liquids against Leishmania infantum
Source: MDPI journal article supplement (doi:10.3390/antibiotics11121841), 2022-12-19
Supplement: s1 [file s1]

## Electronic Supplementary Information

# Synthesis and Biological Evaluation of Amphotericin B based on Organic Salts and Ionic Liquids against *Leishmania Infantum*

Ricardo Ferraz <sup>1,2,\*†</sup>, Nuno Santarém <sup>3,†</sup>, Andreia F. M. Santos <sup>4</sup>, Manuel L. Jacinto <sup>4</sup>, Anabela Cordeiro-da-Silva <sup>3,5</sup>, Cristina Prudêncio <sup>1,6</sup>, João Paulo Noronha <sup>4</sup>, Luis C. Branco <sup>4,\*</sup> and Željko Petrovski <sup>4,\*</sup>

<sup>1</sup> Chemical and Biomolecular Sciences, School of Health, Polytechnic Institute of Porto, 4200-072 Porto, Portugal

<sup>2</sup> LAQV-REQUIMTE, Department of Chemistry and Biochemistry, Faculty of Sciences, University of Porto, 4169-007 Porto, Portugal

<sup>3</sup> Institute for Research and Innovation in Health (i3S), University of Porto, 4200-135 Porto, Portugal

<sup>4</sup> LAQV-REQUIMTE, Department of Chemistry, NOVA School of Science and Technology, NOVA University of Lisbon, 2829-516 Caparica, Portugal

<sup>5</sup> Laboratory of Microbiology, Department of Biological Sciences, Faculty of Pharmacy, University of Porto, 4050-313 Porto, Portugal

<sup>6</sup> Center for Translational Health and Medical Biotechnology Research, Polytechnic Institute of Porto, 4200-465 Porto, Portugal

\* Correspondence: ricardoferraz@eu.ipp.pt (R.F.); l.branco@fct.unl.pt (L.C.B.); z.petrovski@fct.unl.pt (Ž.P.)

† These authors contributed equally to this work.

## Synthesis of OSILs-AmB

In order to minimize the impact from Grob fragmentation and ester hydrolysis, the following OSILs-API based on amphotericin B were prepared using dried solvents (water-free conditions at the beginning of the reaction):

1. [Aliquat][AmB]
2. [Ch][AmB]
3. [C<sub>2</sub>OHMIM][AmB]
4. [C<sub>3</sub>OMIM][AmB]
5. [C<sub>16</sub>Pyr][AmB]
6. [P<sub>6,6,6,14</sub>][AmB]

# 1. [Aliquat][AmB]

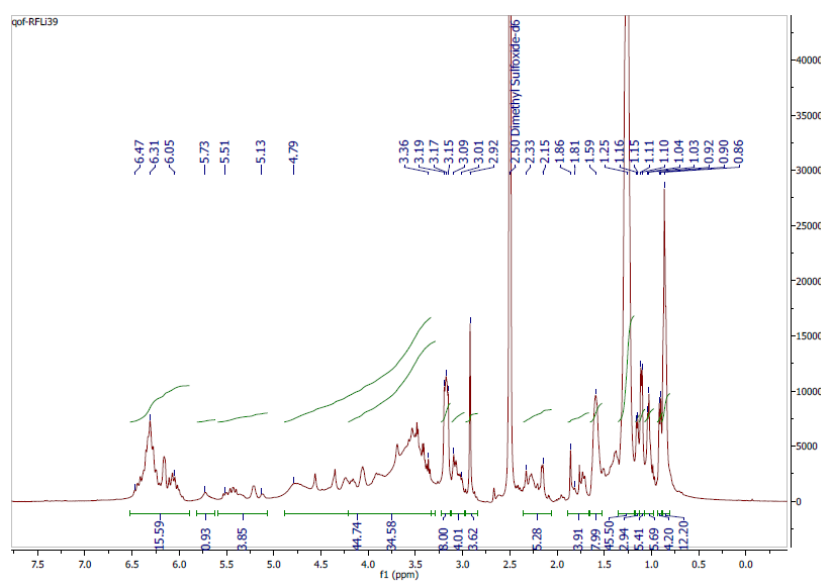

Figure S1: [Aliquat][AmB] <sup>1</sup>H-NMR spectrum in (CD<sub>3</sub>)<sub>2</sub>SO

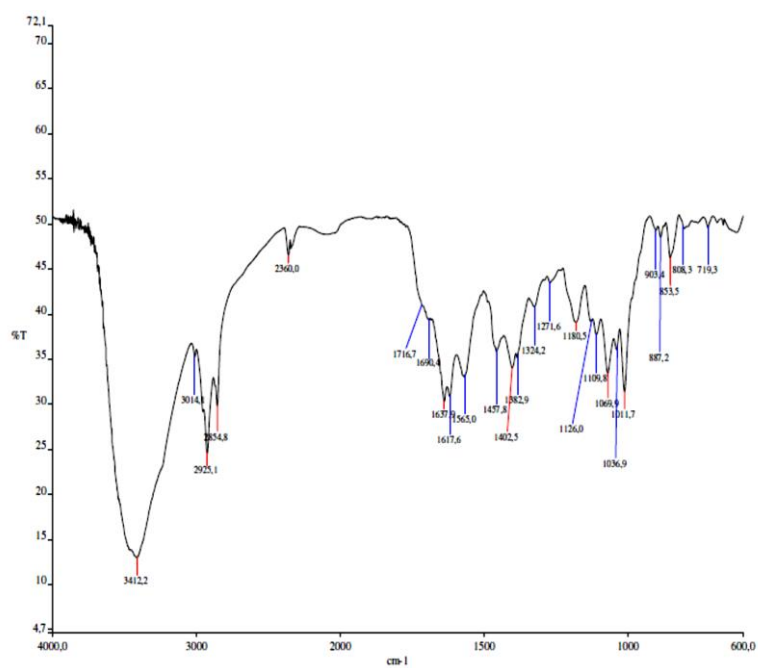

Figure S2: [Aliquat][AmB] FTIR spectrum in KBr

## 2. [Ch][AmB]

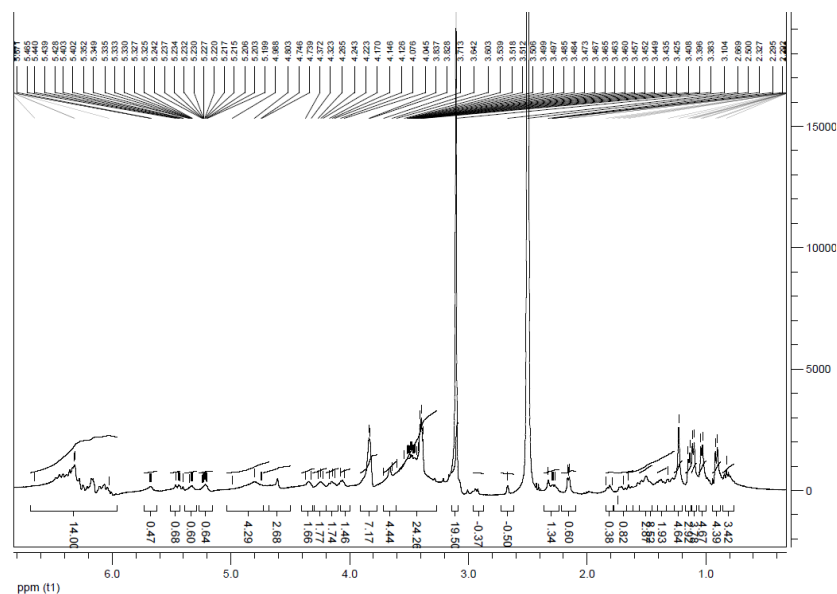

**Figure S3:** [Ch][AmB]  $^1\text{H}$ -NMR spectrum in  $(\text{CD}_3)_2\text{SO}$

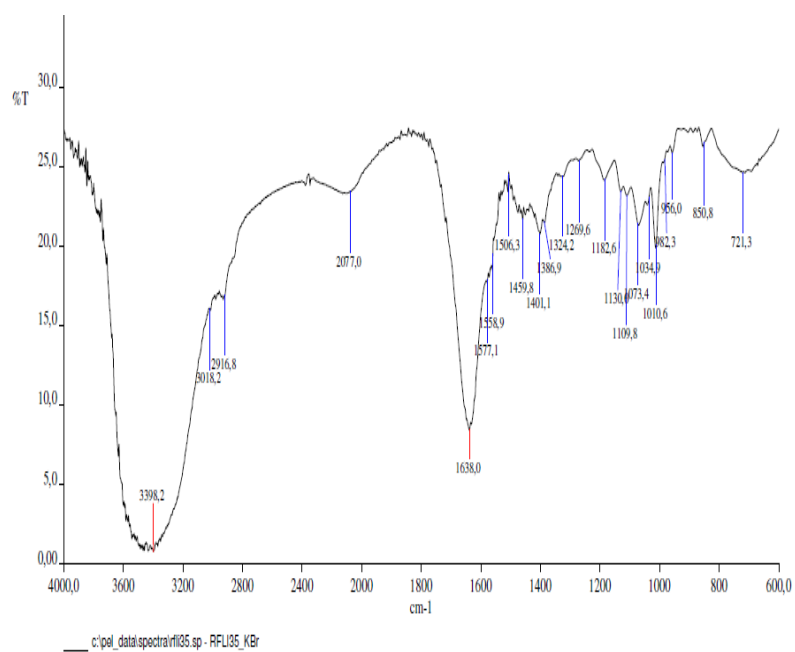

**Figure S4:** [Ch][AmB] FTIR spectrum in KBr

### 3. [C<sub>2</sub>OHMIM][AmB]

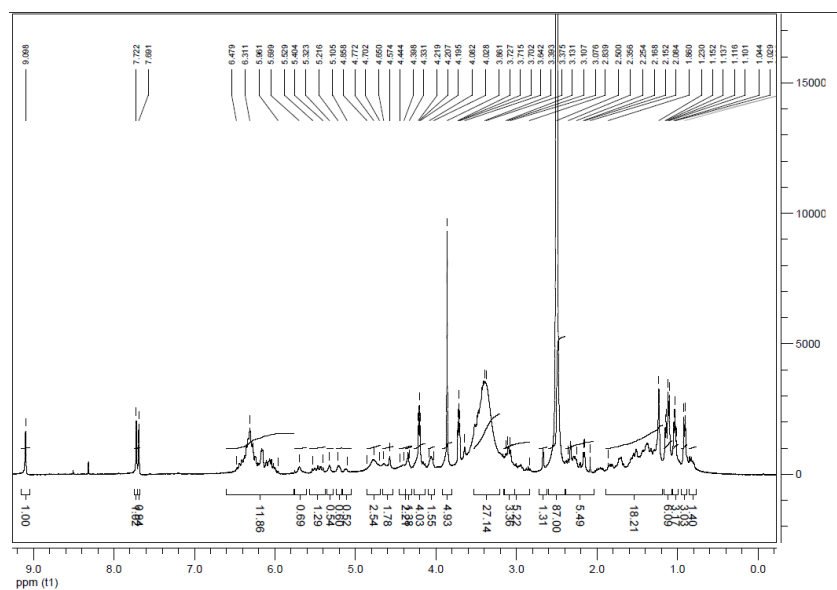

**Figure S5:** [C<sub>2</sub>OHMIM][AmB] <sup>1</sup>H-NMR spectrum in (CD<sub>3</sub>)<sub>2</sub>SO

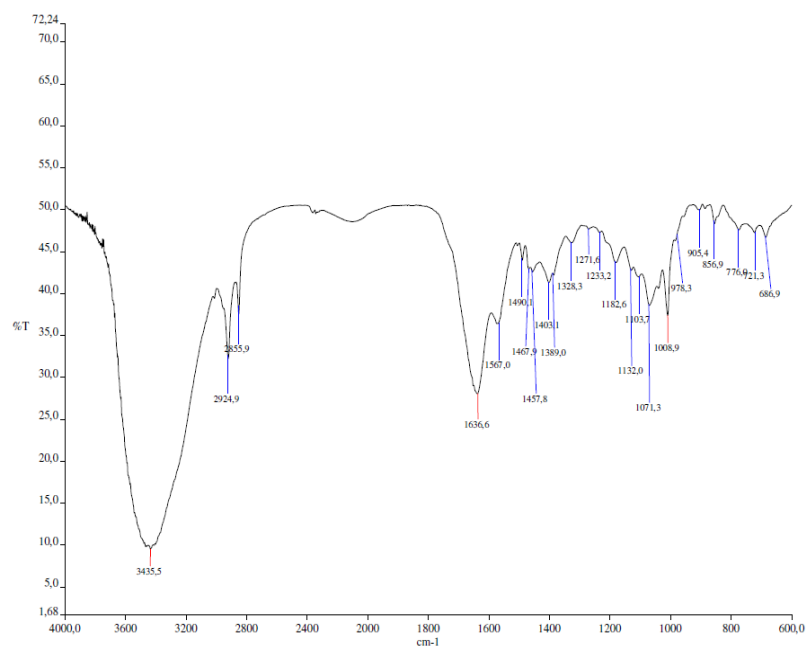

**Figure S6:** [C<sub>2</sub>OHMIM][AmB] FTIR spectrum in KBr

#### 4. [C<sub>3</sub>OMIM][AmB]

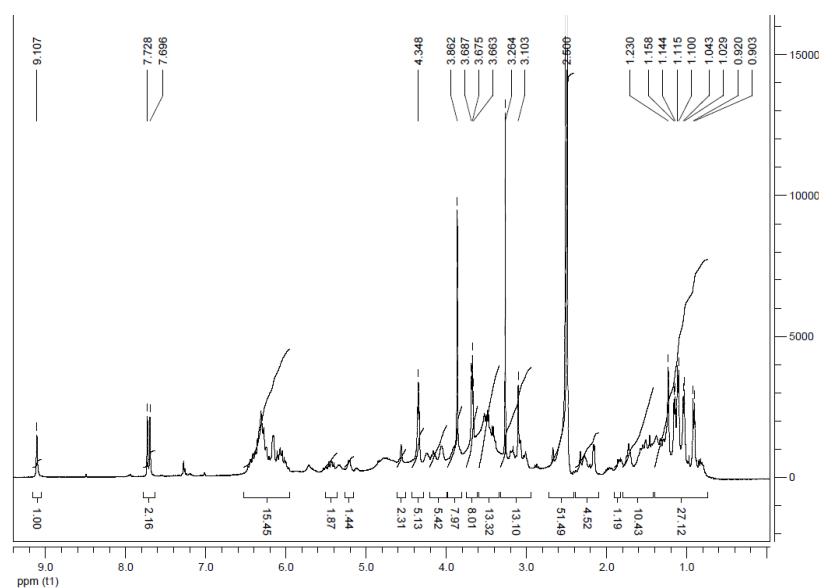

Figure S7: [C<sub>3</sub>OMIM][AmB] <sup>1</sup>H-NMR spectrum in (CD<sub>3</sub>)<sub>2</sub>SO

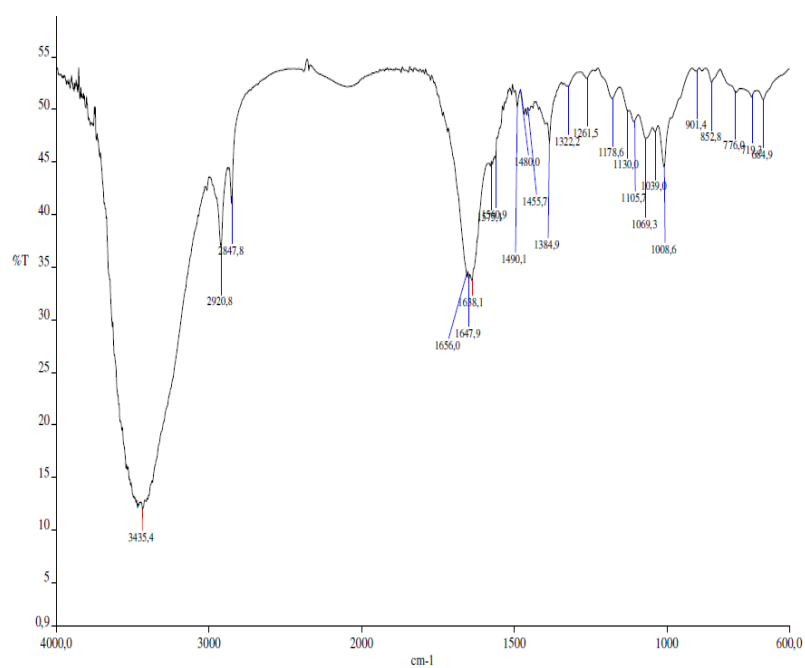

Figure S8: [C<sub>3</sub>OMIM][AmB] FTIR spectrum in KBr

## 5. [C<sub>16</sub>Pyr][AmB]

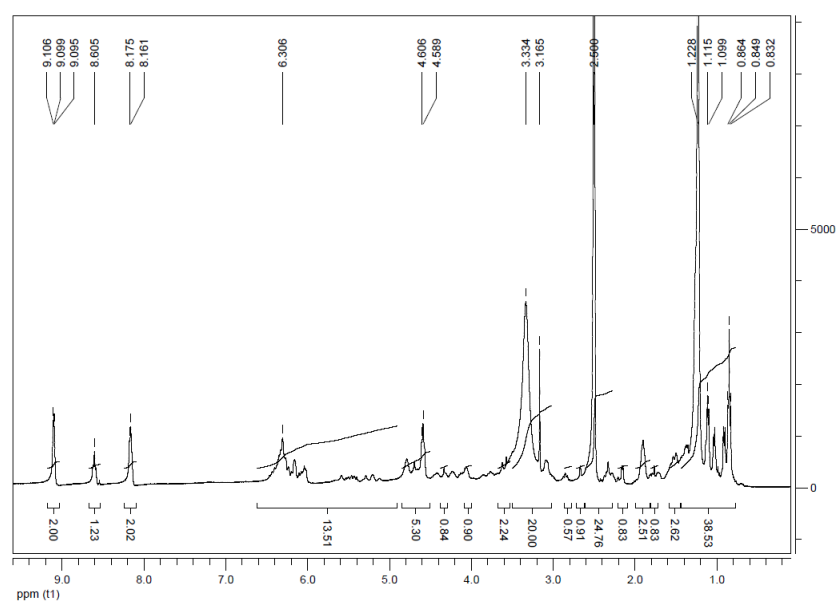

**Figure S9:** [C<sub>16</sub>Pyr][AmB] <sup>1</sup>H-NMR spectrum in (CD<sub>3</sub>)<sub>2</sub>SO

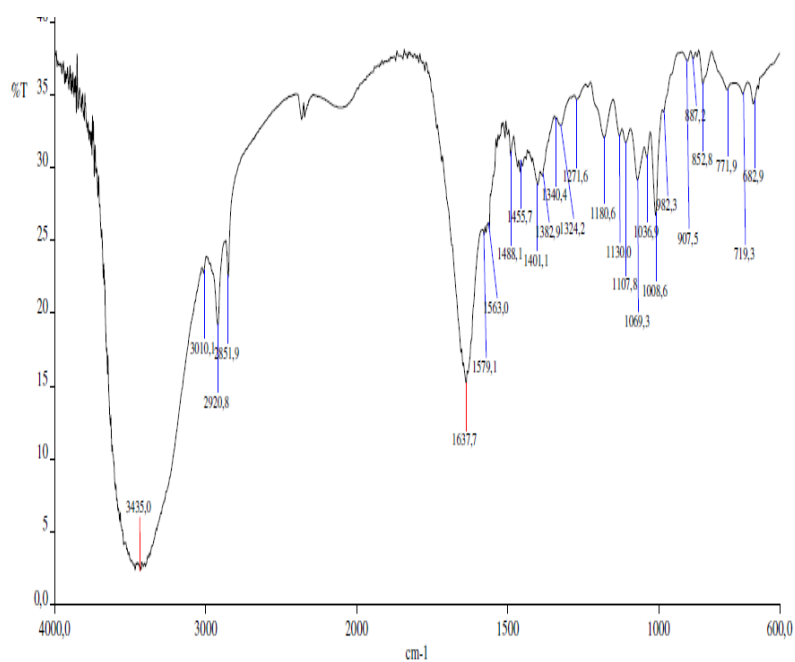

**Figure S10:** [C<sub>16</sub>Pyr][AmB] FTIR spectrum in KBr

## 6. [P<sub>6,6,6,14</sub>][AmB]

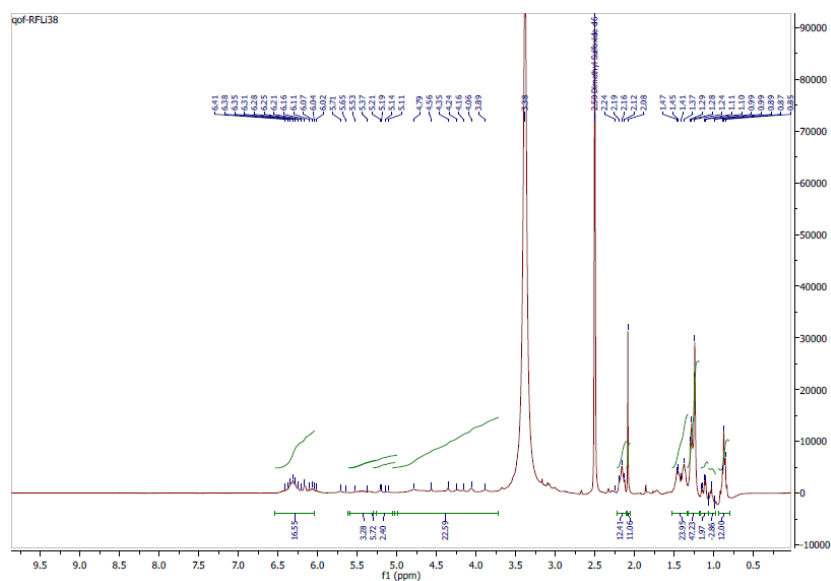

Figure S11: [P<sub>6,6,6,14</sub>][AmB] <sup>1</sup>H-NMR spectrum in (CD<sub>3</sub>)<sub>2</sub>SO

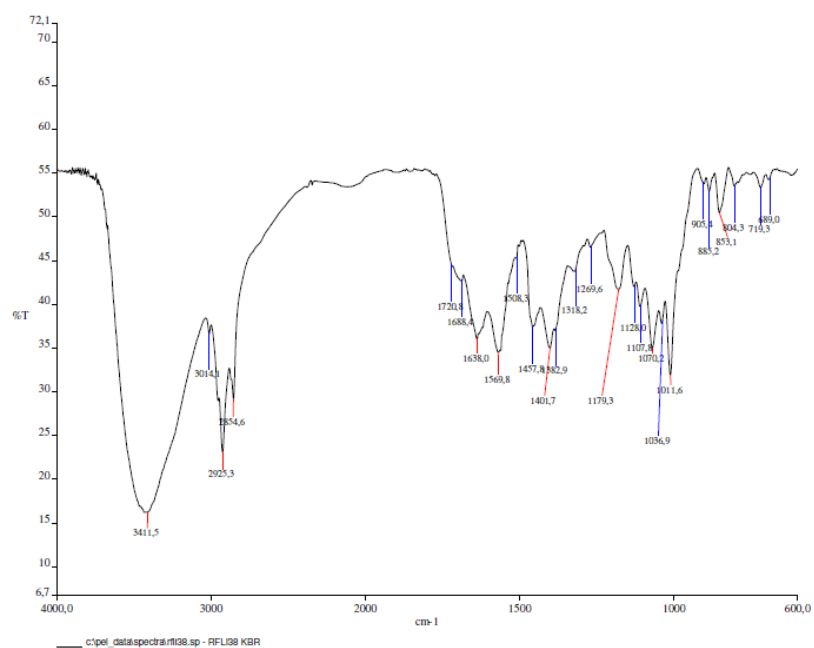

Figure S12: [P<sub>6,6,6,14</sub>][AmB] FTIR spectrum in KBr

## Biological Studies of OSILs-AmB

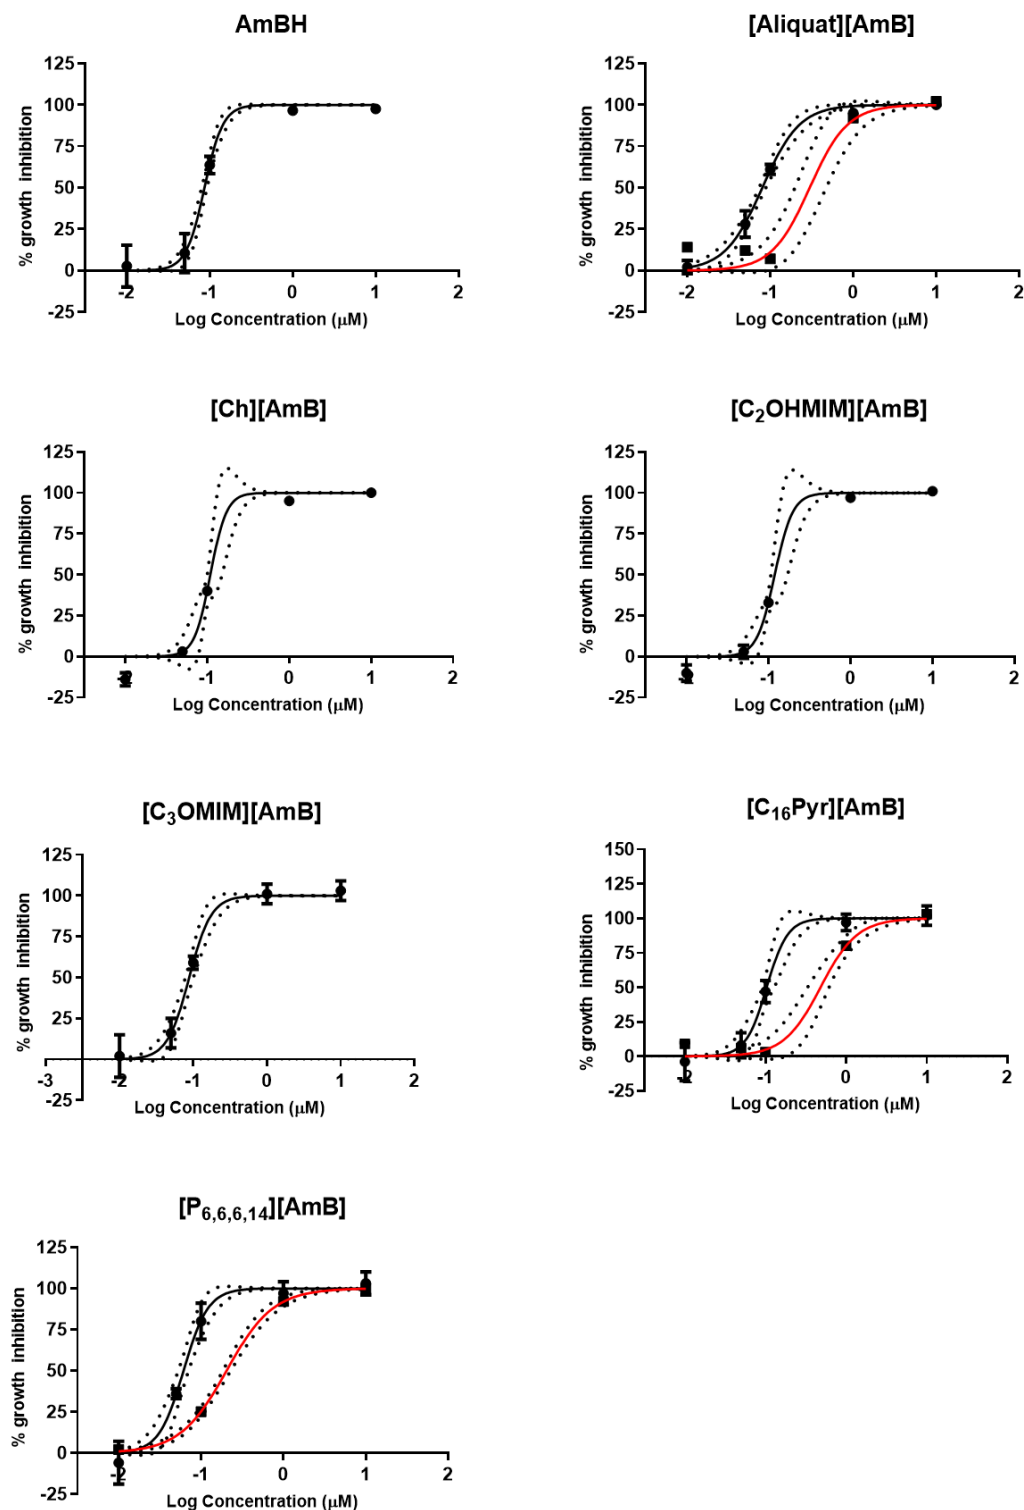

**Figure S13:** Antiparasitic activity of AmBH and each OSIL-AmB. Each point denotes the average growth inhibition and standard deviation for a defined concentration of AmphBH and OSILs-AmphB ( $\bullet$ ) or the respective organic cation in their chloride forms ( $\blacksquare$ ). The solid black line and the solid red line represent the non-linear regression associated with AmBH and OSILs-AmB or the respective organic cation in their chloride forms, respectively. The dashed lines are associated with the non-linear regression, showing 95% confidence bands



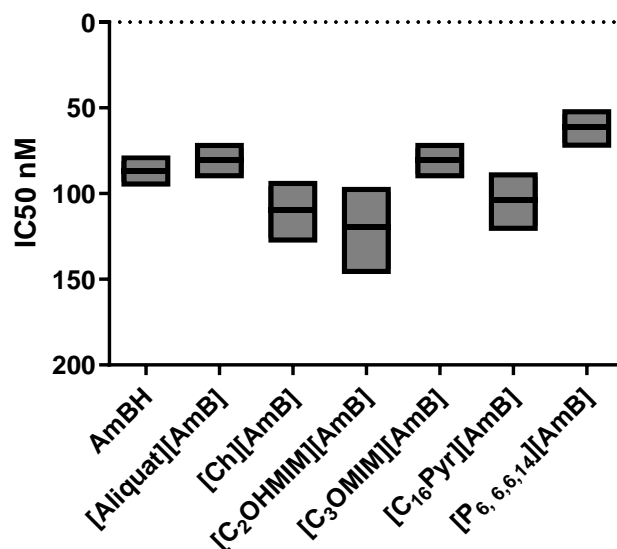

**Figure S14:** Graphical representation depicting the average IC<sub>50</sub> with 95% confidence interval for AmbH and the prepared OSILs-AmbB.

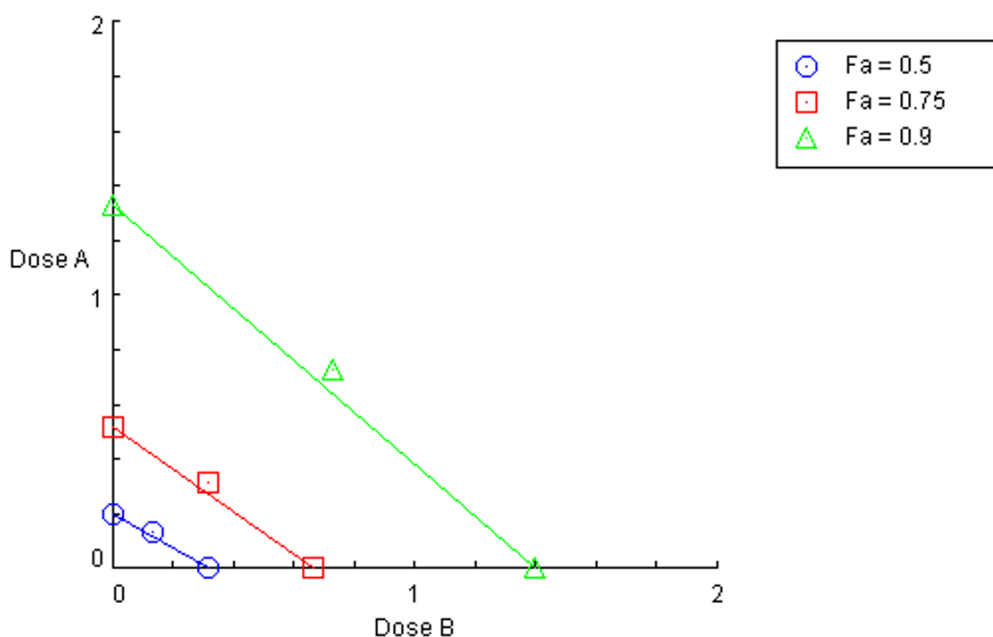

**Figure S15:** Isobologram and combination indexes (CIs) to compare the dose-effect of [P<sub>6,6,6,14</sub>][Amb] with their individual moieties: [Amb]<sup>-</sup> (compound A) and [P<sub>6,6,6,14</sub>]<sup>+</sup> (compound B). The red, blue and green lines connect the predicted values of EC<sub>50</sub> (blue), EC<sub>75</sub> (red) and EC<sub>90</sub> (green) for [P<sub>6,6,6,14</sub>]<sup>+</sup> and [Amb]<sup>-</sup>. The predicted CIs, calculated for EC<sub>50</sub>, EC<sub>75</sub> and EC<sub>90</sub> values of the ionic liquid [P<sub>6,6,6,14</sub>][Amb], are 1.10, 1.08 and 1.06, respectively.
